# Supplementary material for: AMPK activation protects against prostate cancer by inducing a catabolic cellular state
Source: PubMed Central journal article supplement (PMC10576838; doi:10.1016/j.celrep.2023.112396), 2023-04-15
Supplement: NIHMS1897945-supplement-1.pdf [file NIHMS1897945-supplement-1.pdf]

**Supplemental information**

**AMPK activation protects against prostate cancer**

**by inducing a catabolic cellular state**

**Lucy Penfold, Angela Woods, Alice E. Pollard, Julia Arizanova, Eneko Pascual-Navarro, Phillip J. Muckett, Marian H. Dore, Alex Montoya, Chad Whilding, Louise Fets, Joao Mokochinski, Theodora A. Constantin, Anabel Varela-Carver, Damien A. Leach, Charlotte L. Bevan, Alexander Yu. Nikitin, Zoe Hall, and David Carling**

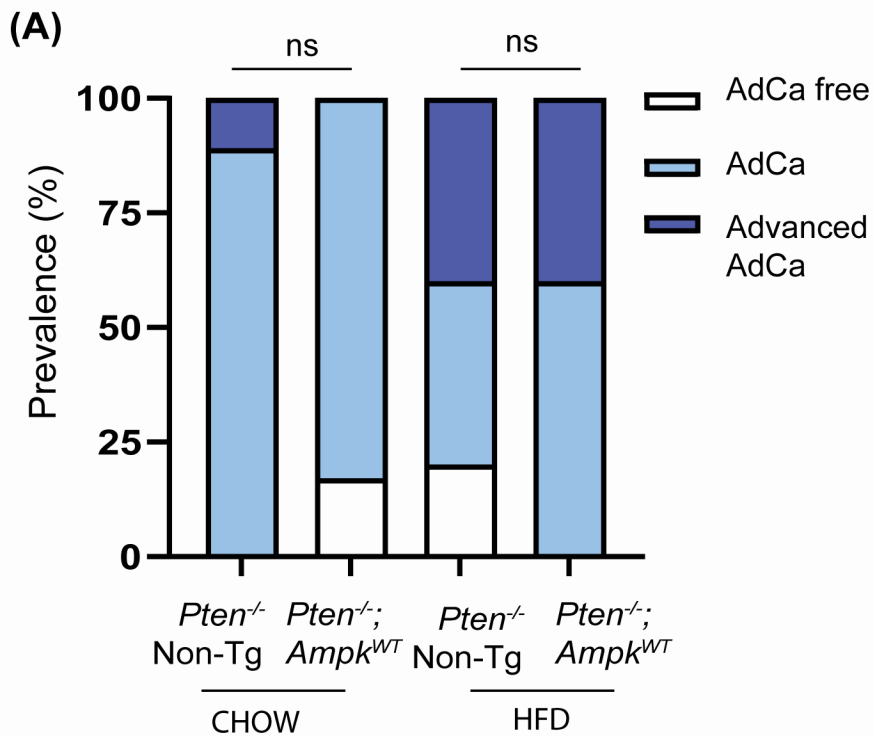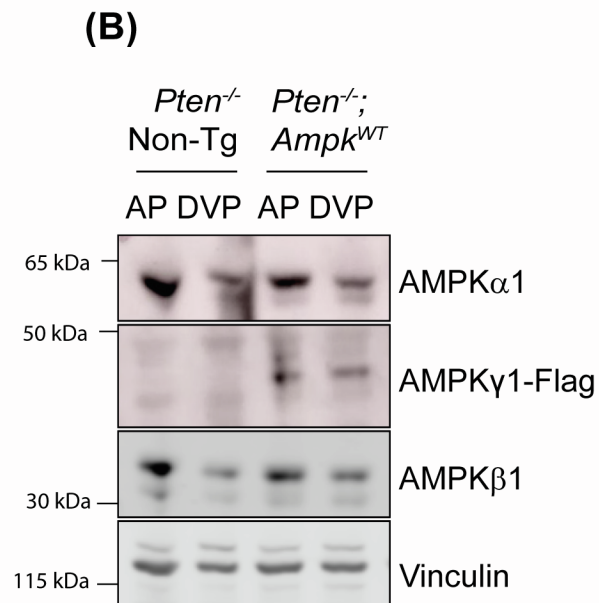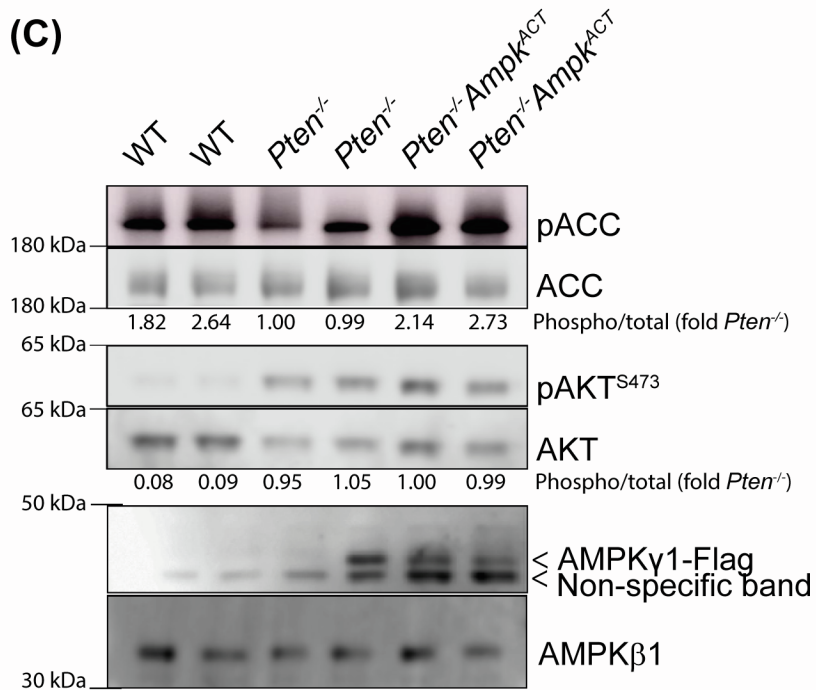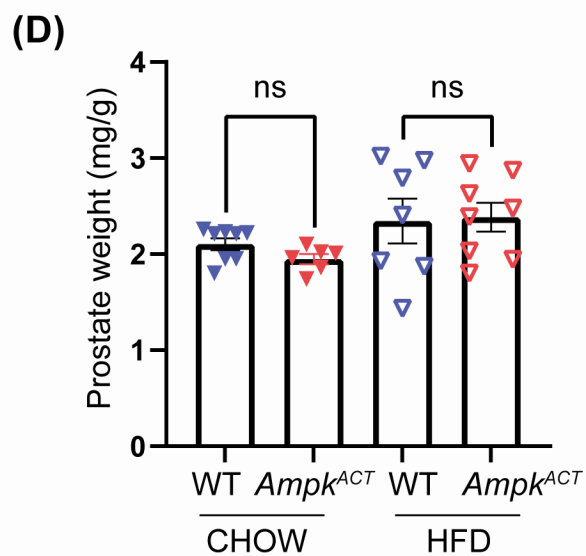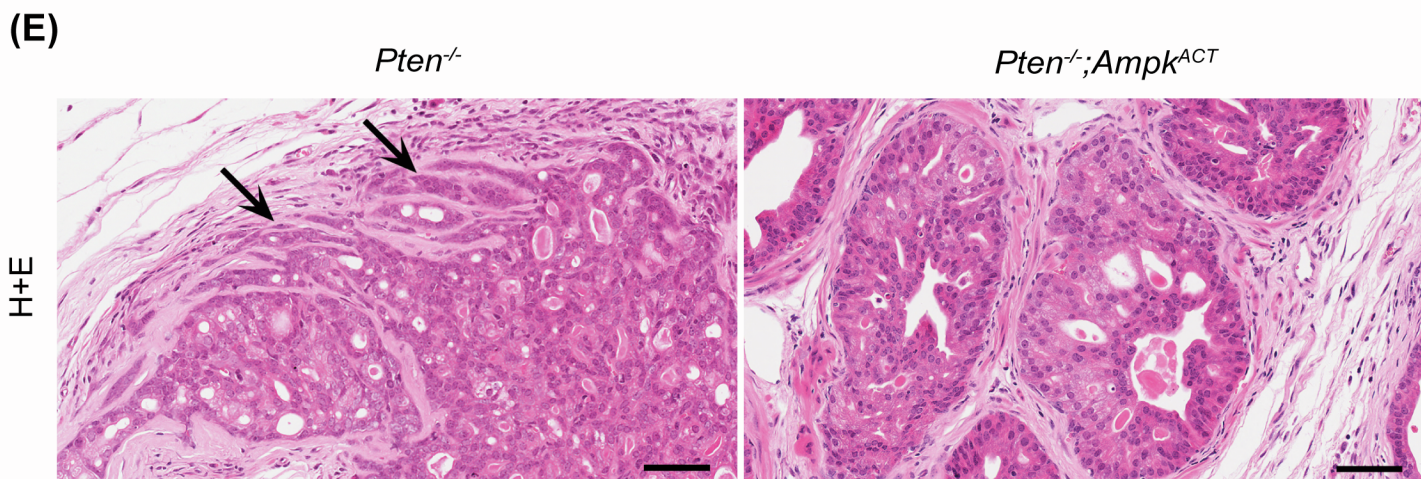

**Figure S1. Expression of wild-type *Prkag1* has no effect on PCa disease progression. Related to Figure 1.**

(A) Quantification of pathological grading from H&E-stained sections isolated from mice aged 17 weeks maintained on chow diet and mice aged 52 weeks that had been fed a high fat diet (HFD) for the final 12 weeks. All mice lacked *Pten* expression in the prostate (*Pten*<sup>-/-</sup>) and were either positive (*Ampk*<sup>WT</sup>) or negative (Non-Tg) for prostate-specific expression of wild-type *Prkag1* transgene. Data shown are for n=9 (*Pten*<sup>-/-</sup>, Chow), n=6 (*Pten*<sup>-/-</sup>;*Ampk*<sup>WT</sup>, Chow), n=5 (*Pten*<sup>-/-</sup>, HFD), and n=5 (*Pten*<sup>-/-</sup>;*Ampk*<sup>WT</sup>, HFD). AdCa; adenocarcinoma. (B) Western blot analysis of endogenous AMPK  $\alpha$ 1 and  $\beta$ 1 subunits in anterior prostate (AP) and dorsolateral ventral prostate (DVP) lobes isolated from Non-Tg or *Ampk*<sup>WT</sup> *Pten*<sup>-/-</sup> mice. Expression of the *Ampk*<sup>WT</sup> transgene was detected using an anti-FLAG antibody. Vinculin was used to monitor total protein levels. (C) Western blot analysis of prostate organoids generated from wild-type (WT), *Pten*<sup>-/-</sup>, *Pten*<sup>-/-</sup>;*Ampk*<sup>WT</sup> and *Pten*<sup>-/-</sup>;*Ampk*<sup>ACT</sup> mice aged 1 year. Quantification is shown beneath respective blots and represents level of phosphorylated/total protein (fold *Pten*<sup>-/-</sup>). Note that one of the *Pten*<sup>-/-</sup> organoid cultures expresses Flag-tagged wild-type  $\gamma$ 1. (D) Weight of whole prostate isolated from wild type (WT) mice or *Ampk*<sup>ACT</sup> mice at ~14 weeks of age fed a chow diet or from mice aged ~36 weeks of age that had been fed a HFD diet for 16 weeks (from ~20 weeks of age). (E) Representative H&E-stained prostate sections collected from *Pten*<sup>-/-</sup> or *Pten*<sup>-/-</sup>;*Ampk*<sup>ACT</sup> mice after 12 weeks HFD diet are shown and illustrate advanced AdCa and PIN4, respectively. Areas of stromal invasion by AdCa are shown by arrows on *Pten*<sup>-/-</sup> section. Scale bar: 60  $\mu$ m.

(A)

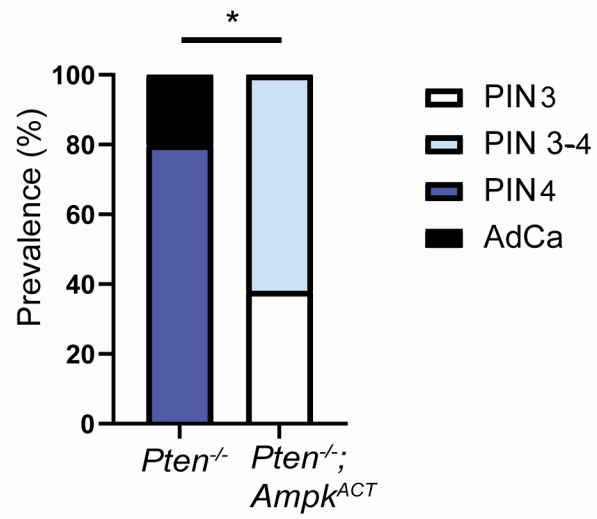

H+E

$Pten^{-/-}$

$Pten^{-/-}; Ampk^{ACT}$

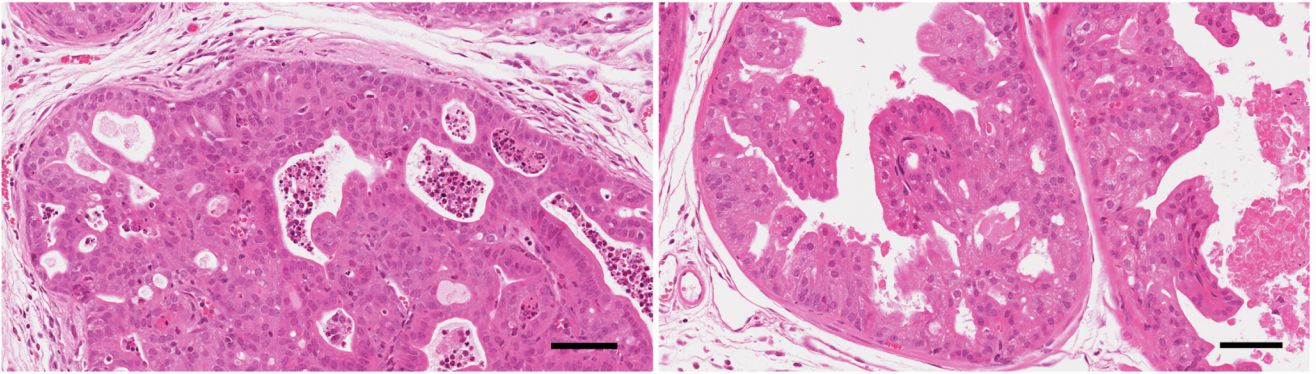

(B)

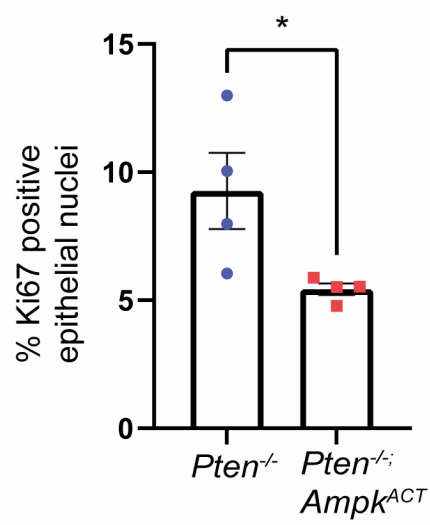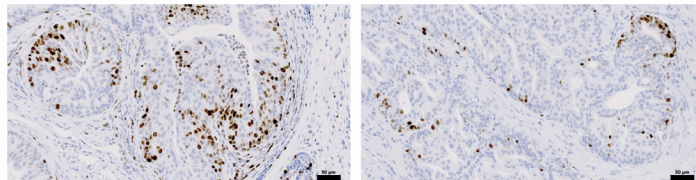

**Figure S2. Characterisation *Pten*<sup>-/-</sup> and *Pten*<sup>-/-</sup>;*Ampk*<sup>ACT</sup> mice at 17 weeks. Related to Figure 1.**

(A) Quantification of grading using H&E-stained sections from *Pten*<sup>-/-</sup> or *Pten*<sup>-/-</sup>;*Ampk*<sup>ACT</sup> mice aged 17 weeks. AdCa; adenocarcinoma. Significant difference between AdCa and PIN4 groups vs all other groups is shown using Fisher exact test (two-sided p value) \*p < 0.05, (n=5 for *Pten*<sup>-/-</sup>; n=8 for *Pten*<sup>-/-</sup>;*Ampk*<sup>ACT</sup>). Representative H&E-stained prostate sections isolated from *Pten*<sup>-/-</sup> or *Pten*<sup>-/-</sup>;*Ampk*<sup>ACT</sup> mice are shown and illustrate PIN4 and PIN3, respectively. Scale bar: 60 µm. (B) Percentage of Ki-67–positive cells in prostate epithelium of 17 week old mice (n=4 per genotype; at least 10,000 epithelial cells per section). Representative images of Ki-67–stained sections for each genotype are shown (scale bar: 50 µm). Data shown as mean ±SEM. Statistically significant differences between genotypes are shown as \*p < 0.05.

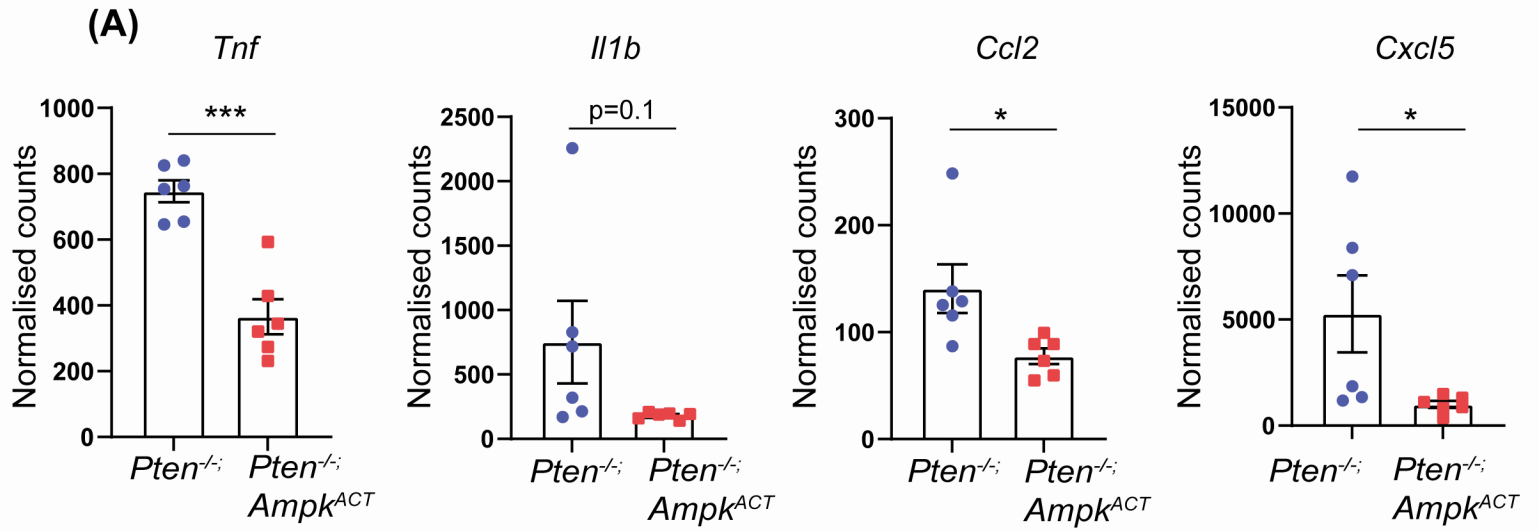

**(B)** NF- $\kappa$ B staining

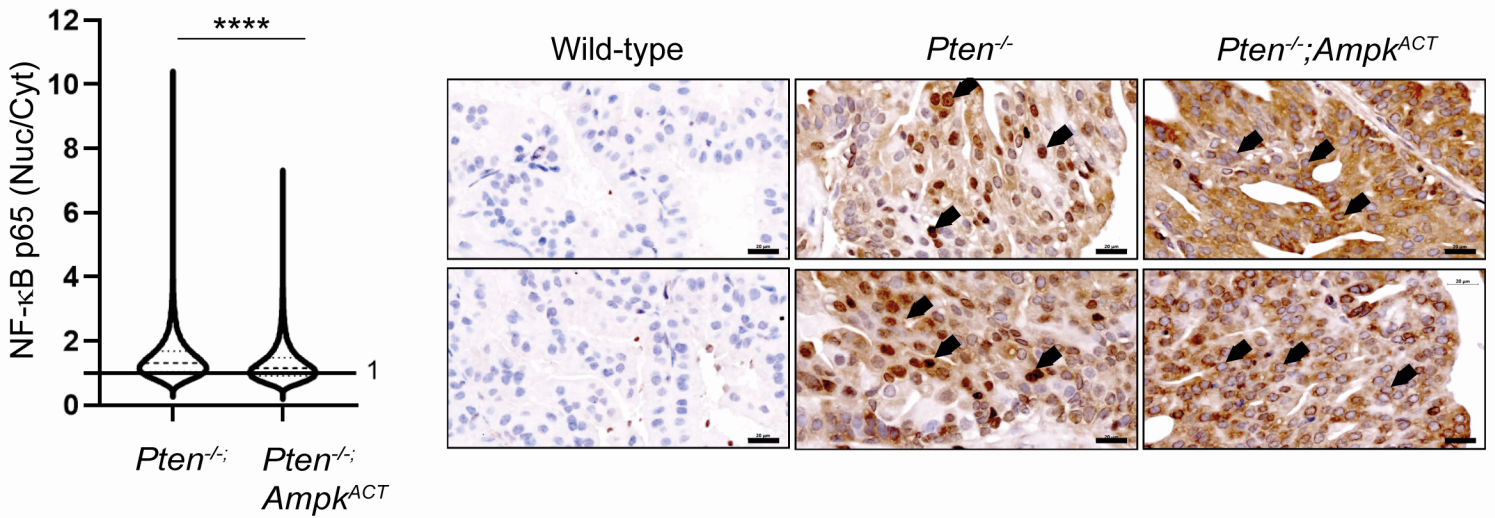

**(C)** Cleaved-caspase 3 staining

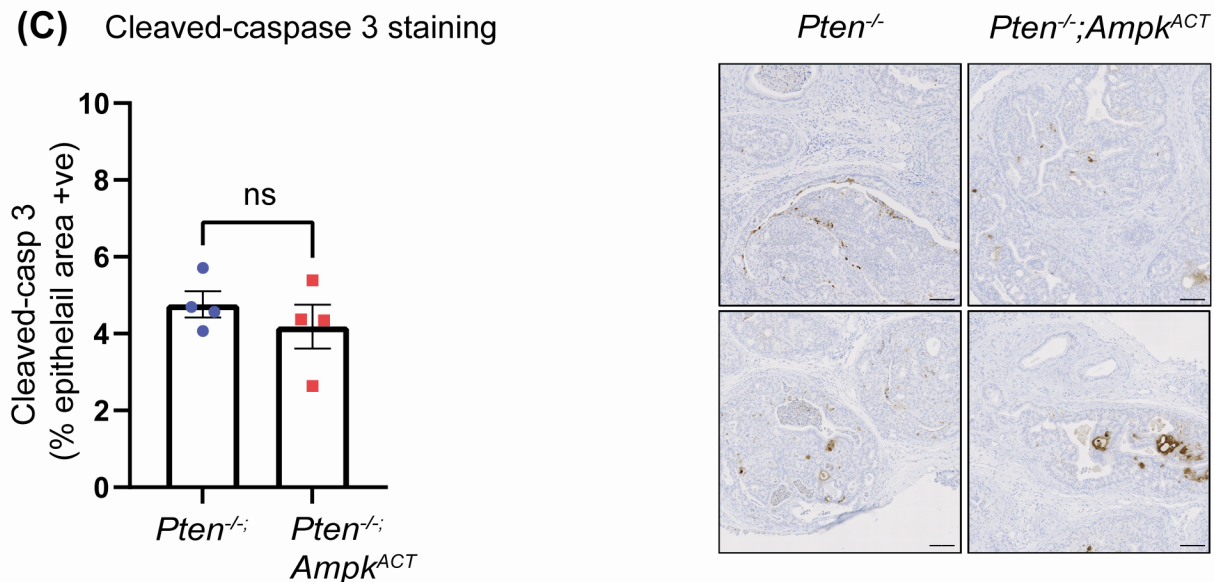

**Figure S3. AMPK activation inhibits pro-inflammatory signalling in PCa. Related to Figure 2.** (A) Gene expression of candidate pro-inflammatory genes is shown as determined by RNA-sequencing. Data shown as mean  $\pm$ SEM (n=6 mice per genotype); Student's t-test was used to determine significant differences between genotypes \*p <0.05, \*\*\*p <0.005. (B) Ratio of nuclear to cytosolic NF- $\kappa$ B staining and (C) quantification of cleaved caspase-3 staining, in prostate sections from wild-type (WT), *Pten*<sup>-/-</sup> and *Pten*<sup>-/-</sup>;*Ampk*<sup>ACT</sup> mice aged 17 weeks. In both cases, representative images are shown alongside the graphs (panel B, scale bar: 20  $\mu$ m; panel C, scale bar: 100  $\mu$ m.).

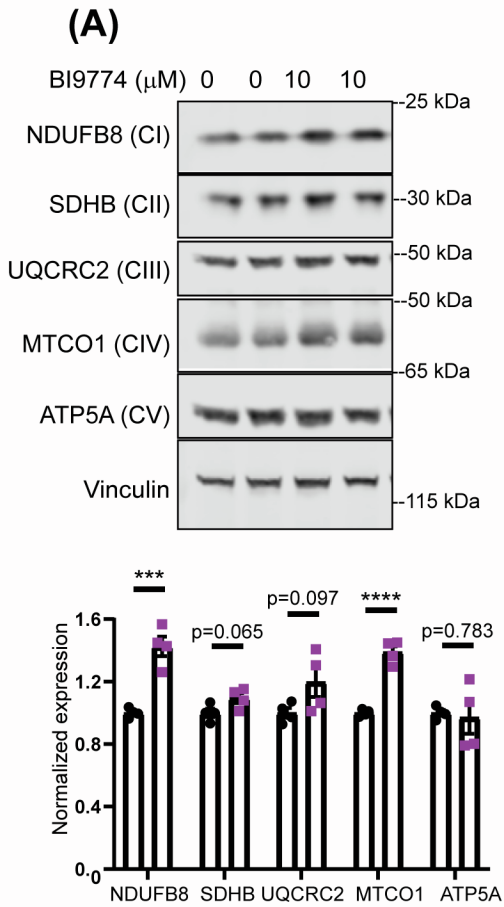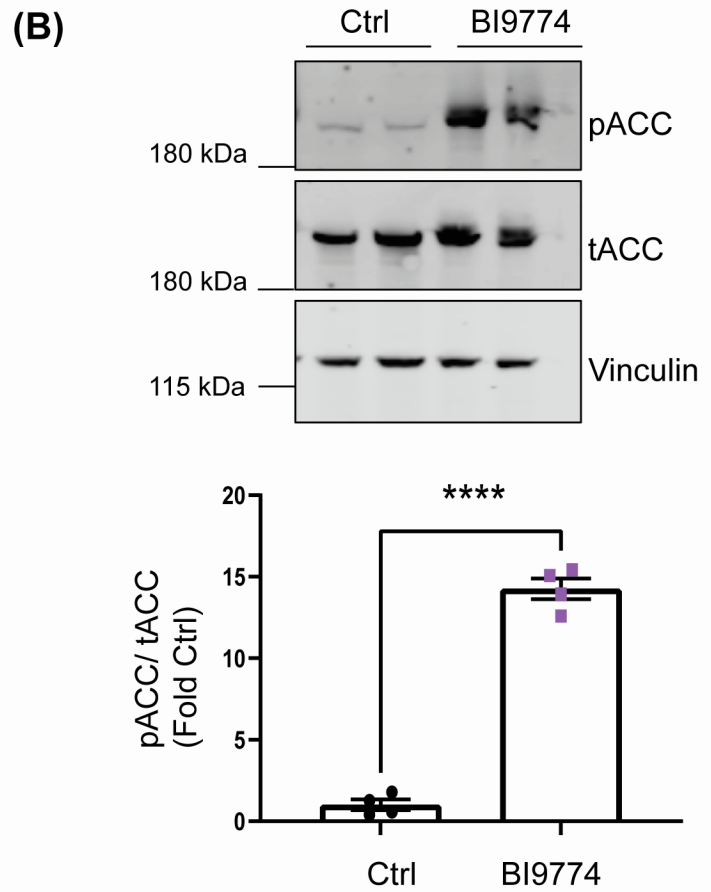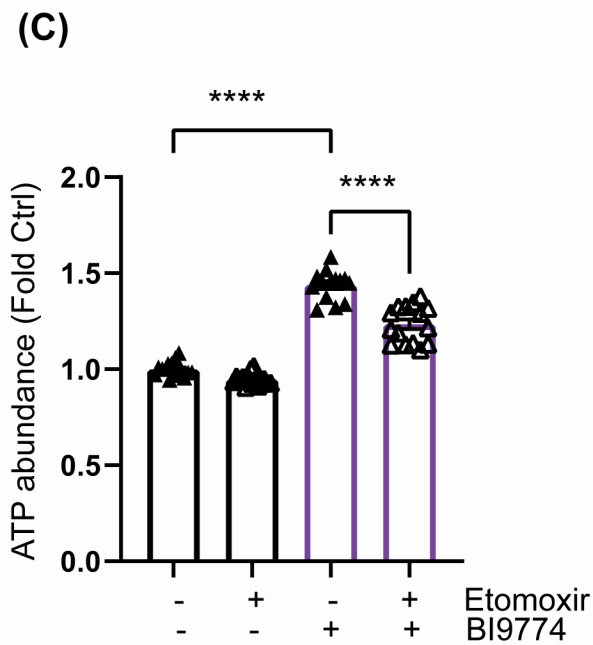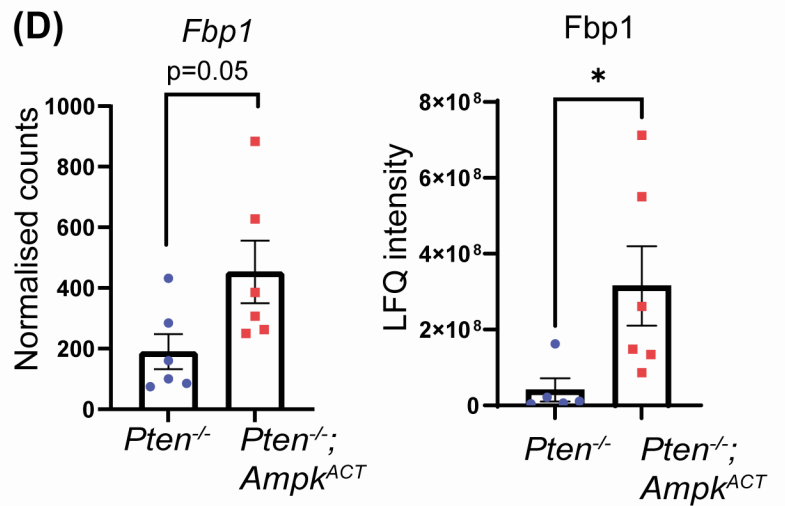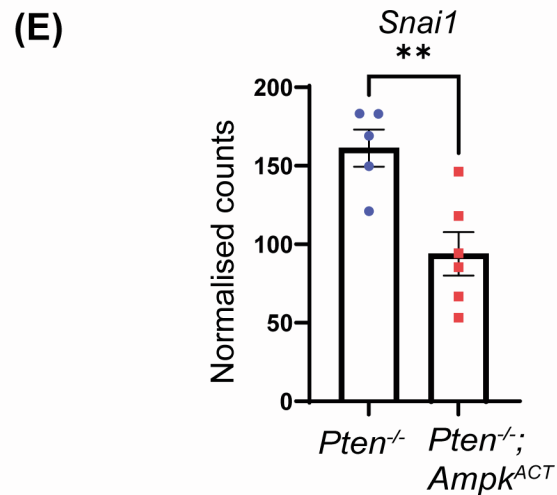



**Figure S4. Characterisation of C4-2 cells treated with BI9774 for 7 days. Related to Figure 4.**

(A) Representative Western blot analysis of mitochondrial electron transport chain proteins and quantification of normalized protein expression in cells treated in the presence or absence of 10  $\mu$ M BI9774 for 7 days. (B) Quantification of ACC phosphorylation (pACC) relative to total ACC (tACC) protein, together with a representative Western blot, in cells treated as in (A). For (A) and (B) data shown are mean  $\pm$ SEM (n=4 per condition) and Student's t-test was used to determine significant differences between groups \*p <0.05, \*\*\*p <0.005. (C) ATP abundance was determined in cells treated  $\pm$  BI9774 (10  $\mu$ M) for 7 days, and treated  $\pm$  etomoxir (50  $\mu$ M) over the final 24 h. Data shown are means  $\pm$ SEM (n=15 per condition) and one-way Anova with Tukey's post hoc test was used to determine significant differences between groups, \*\*\*\*p <0.001. (D) *Fbp1* mRNA and protein expression and (E) *Snai1* mRNA expression in *Pten*<sup>-/-</sup> and *Pten*<sup>-/-</sup>;*Ampk*<sup>ACT</sup> mouse prostates from 17-week old mice. Data shown as mean  $\pm$ SEM (n=6 per genotype); Student's t-test was used to determine statistically significant differences between genotypes \*p <0.05, \*\*p <0.01.

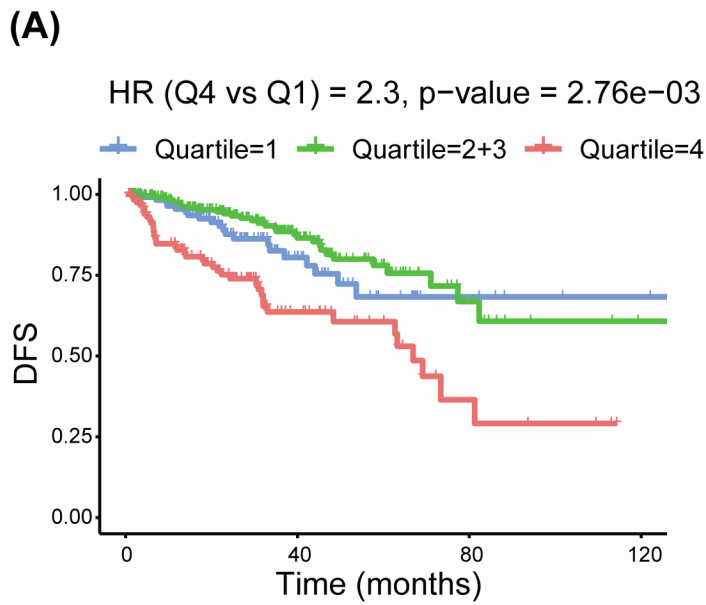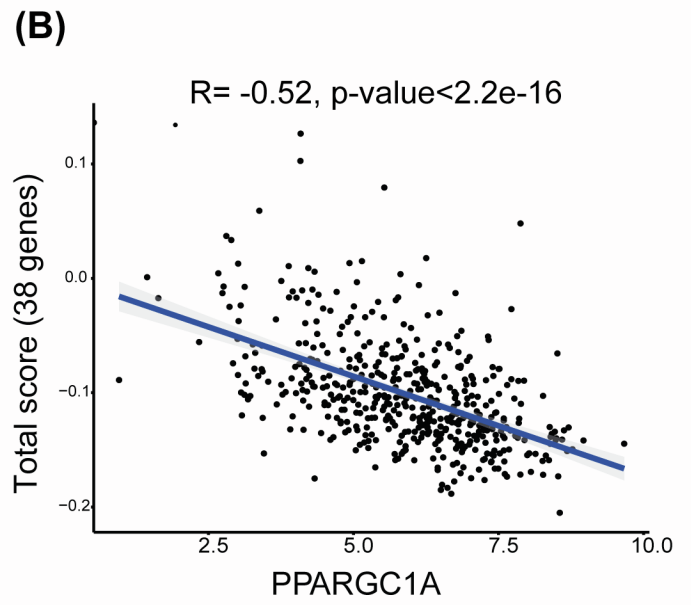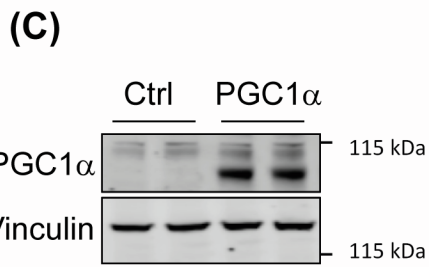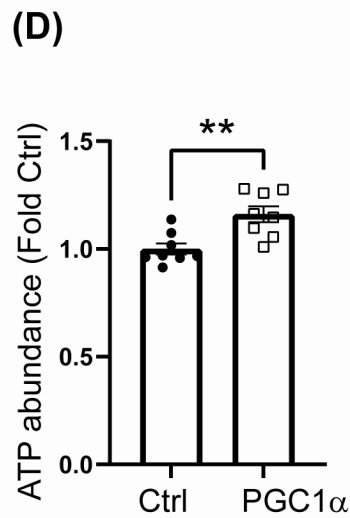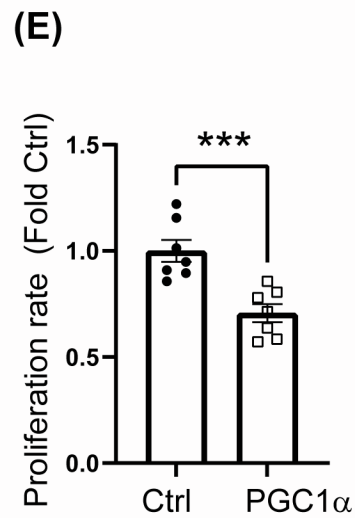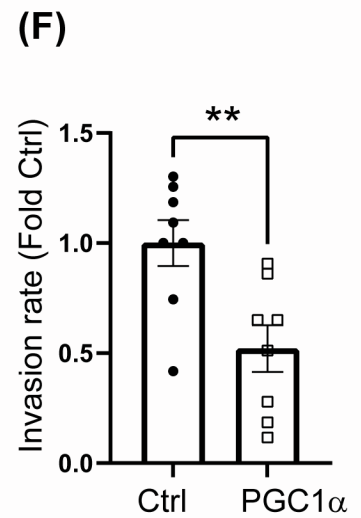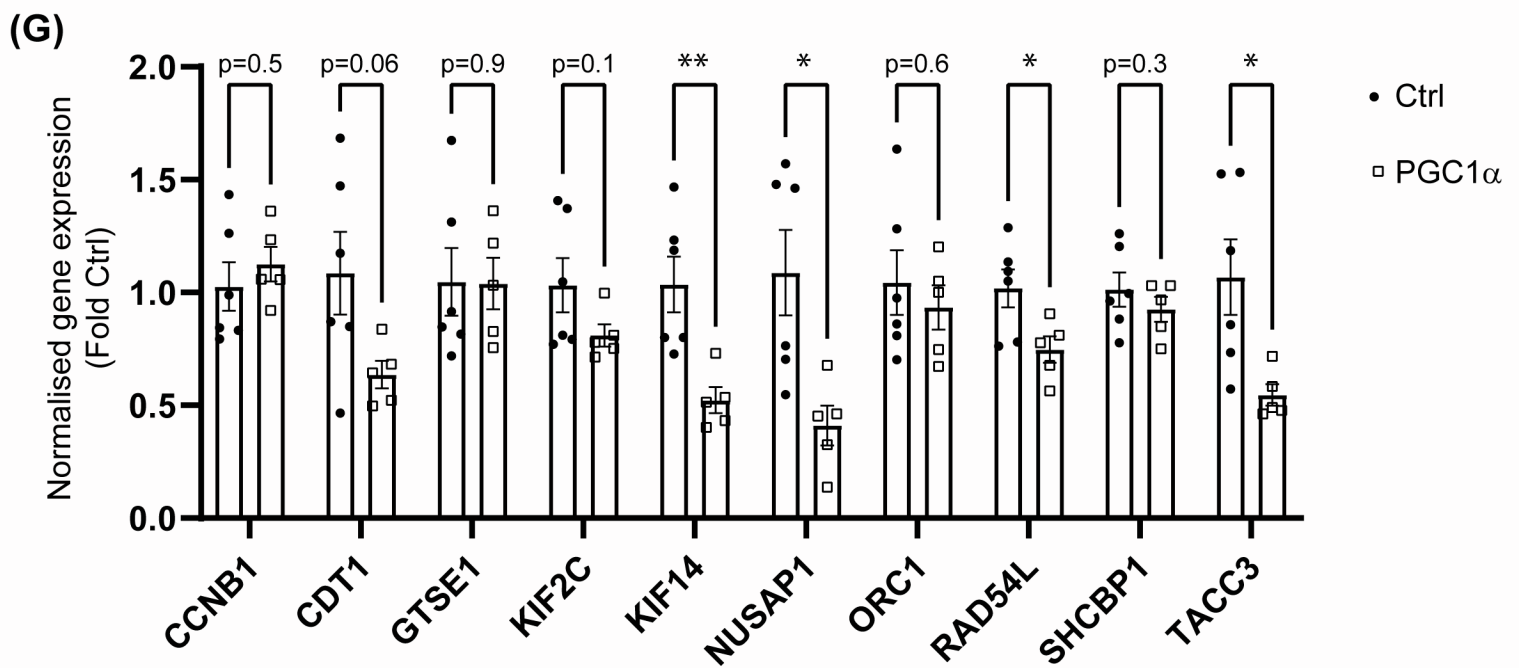

**Figure S5. Role of PGC1 $\alpha$  in mediating the downstream effects of AMPK activation. Related to Figures 4 and 5.**

(A) Gene expression of 38 genes identified as a cell cycle network in the significantly differentially expressed genes in prostates from 17 week old *Pten*<sup>-/-</sup> and *Pten*<sup>-/-</sup>;*Ampk*<sup>ACT</sup> mice in human PCa separated by disease free survival (DFS) using the TCGA PRAD dataset<sup>25</sup> analysed using CANCERTOOL. Inset shows tabulated data for Hazard ratio (HR) between Q4 and Q1 and p-value. (B) Correlation of gene expression with *PGC1 $\alpha$*  (*PPARGC1A*) gene expression using the TCGA PRAD dataset analysed using CANCERTOOL. Inset shows tabulated data for Rank Correlation Coefficient (R) value and p-value. (C) C4-2 cells were transiently transfected with *PGC1 $\alpha$*  or a control. 72 hours post-transfection, *PGC1 $\alpha$*  expression was determined by Western blot analysis. (D) ATP abundance, (E) cell proliferation and (F) cell invasion were determined (mean  $\pm$ SEM, n=7-8). (G) mRNA expression for the 10 “AMPK-Cell Cycle” genes was determined (mean  $\pm$ SEM, n=4-5). Student’s t-test was used to determine significant differences between groups \*p <0.05, \*\*p <0.01, \*\*\*p < 0.005.

(A) TCGA

ACACA

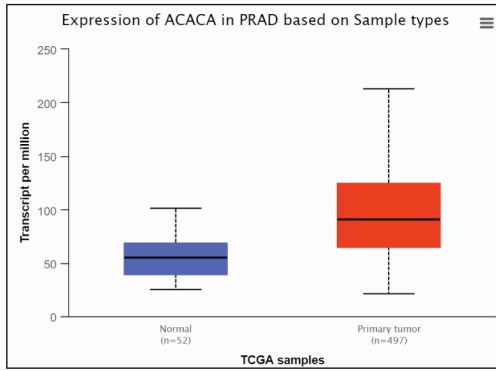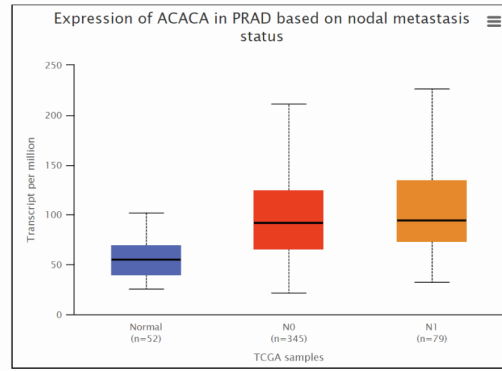

ACACB

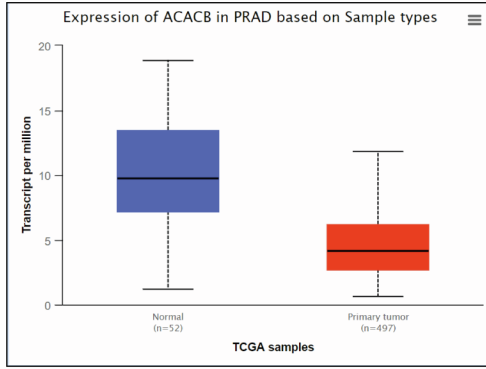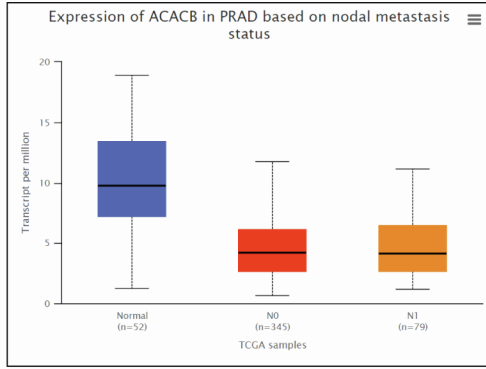

(B) GSE21034

ACACA

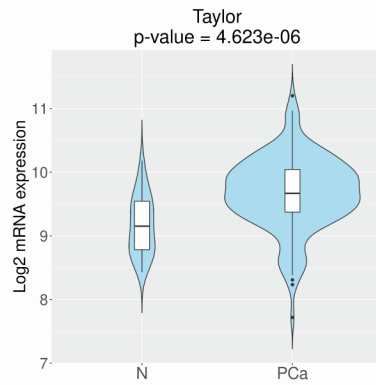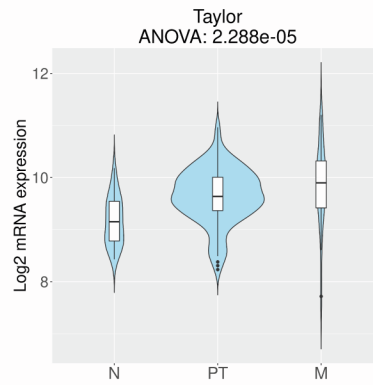

ACACB

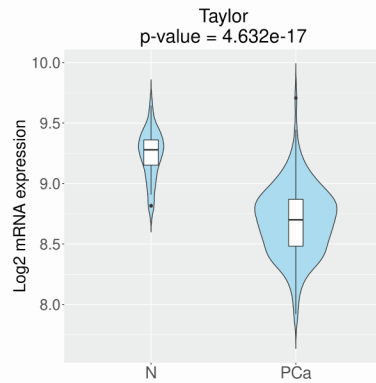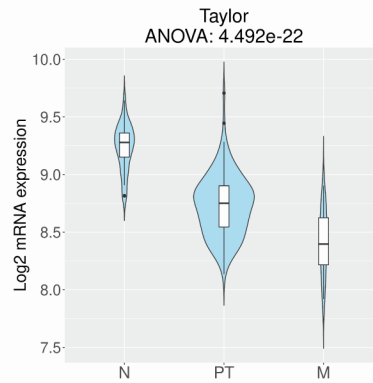

(C) Correlation analysis

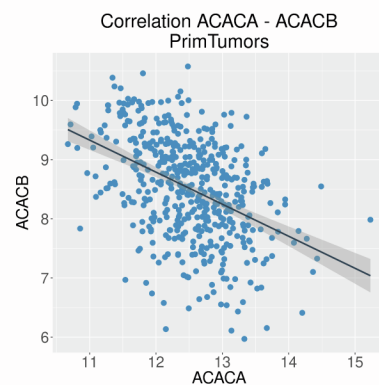

|      | R value  | p value   |
|------|----------|-----------|
| TCGA | -0.43318 | < 2.2e-16 |

**Figure S6. ACACA and ACACB gene expression in human PCa. Related to Figures 3 and 6.**

(A) *ACACA* and *ACACB* gene expression in human prostate separated by disease status (normal, no nodal PCa metastasis, or with nodal PCa metastasis), using the TCGA PRAD dataset <sup>25</sup> (n=497), analysed using UALCAN. (B) *ACACA* and *ACACB* gene expression in human prostate separated by disease status (N, normal; PT, primary tumour; M, metastasis) using the GSE21034 dataset <sup>26</sup> (benign n=29, localised cancer n=131, metastasis n=19). (C) Correlation of *ACACA* and *ACACB* gene expression in human PCa using the TCGA PRAD dataset. Inset shows tabulated data for Rank Correlation Coefficient (R) value and p-value. Data in (B) and (C) analysed using CANCEERTOOL.

**Table S1. List of genes identified as *PPARGC1A* targets from Torrano et al.<sup>22</sup>. Related to Figures 2 and 3.**

| Gene symbol | adj. p value | p Value  | log2FC   | FC       | Gene name                                                                                  | Identified in proteomic analysis |
|-------------|--------------|----------|----------|----------|--------------------------------------------------------------------------------------------|----------------------------------|
| ECM1        | 2.61E-05     | 1.46E-09 | 2.528707 | 5.770541 | extracellular matrix protein 1                                                             | Yes                              |
| ATP1B1      | 0.000785     | 2.19E-07 | 1.61885  | 3.071301 | ATPase Na <sup>+</sup> /K <sup>+</sup> transporting subunit beta 1                         | Yes                              |
| MPC1        | 0.002599     | 1.23E-06 | 1.175036 | 2.257985 | mitochondrial pyruvate carrier 1                                                           | Yes                              |
| SPINK13     | 0.044286     | 4.30E-04 | 1.120446 | 2.174142 | serine peptidase inhibitor, Kazal type 13 (putative)                                       | No                               |
| GOT1        | 0.00044      | 7.91E-08 | 1.022392 | 2.031284 | glutamic-oxaloacetic transaminase 1                                                        | Yes                              |
| TP53INP2    | 0.007772     | 1.30E-05 | 0.961227 | 1.946965 | tumor protein p53 inducible nuclear protein 2                                              | No                               |
| CPLX1       | 0.002932     | 1.96E-06 | 0.944219 | 1.924147 | complexin 1                                                                                | No                               |
| UBC         | 0.002932     | 1.89E-06 | 0.871946 | 1.83013  | ubiquitin C                                                                                | Yes                              |
| GSTM1       | 0.005469     | 5.09E-06 | 0.824334 | 1.770717 | glutathione S-transferase mu 1                                                             | Yes                              |
| ENDOG       | 0.002599     | 1.30E-06 | 0.823681 | 1.769916 | endonuclease G                                                                             | Yes                              |
| NDUFA4      | 0.001381     | 4.62E-07 | 0.816954 | 1.761683 | NDUFA4, mitochondrial complex associated                                                   | Yes                              |
| ZDHHHC23    | 0.008967     | 2.27E-05 | 0.798716 | 1.739552 | zinc finger DHHC-type containing 23                                                        | No                               |
| COX7B       | 0.008153     | 1.77E-05 | 0.787894 | 1.726553 | cytochrome c oxidase subunit 7B                                                            | No                               |
| IDH3A       | 0.010874     | 3.34E-05 | 0.781632 | 1.719075 | isocitrate dehydrogenase 3 (NAD(+)) alpha                                                  | Yes                              |
| DECR1       | 0.005469     | 5.19E-06 | 0.769427 | 1.704592 | 2,4-dienoyl-CoA reductase 1, mitochondrial                                                 | Yes                              |
| WIPI1       | 0.031288     | 2.37E-04 | 0.75735  | 1.690383 | WD repeat domain, phosphoinositide interacting 1                                           | Yes                              |
| UQCRLH      | 0.011911     | 4.19E-05 | 0.752631 | 1.684862 | ubiquinol-cytochrome c reductase hinge protein like                                        | No                               |
| CLYBL       | 0.008485     | 1.94E-05 | 0.74501  | 1.675986 | citrate lyase beta like                                                                    | Yes                              |
| RNASE4      | 0.01299      | 4.64E-05 | 0.741299 | 1.67168  | ribonuclease A family member 4                                                             | Yes                              |
| LDHD        | 0.031288     | 2.28E-04 | 0.737828 | 1.667664 | lactate dehydrogenase D                                                                    | Yes                              |
| MCCC1       | 0.006176     | 6.41E-06 | 0.704154 | 1.629189 | methylcrotonoyl-CoA carboxylase 1                                                          | Yes                              |
| RBM47       | 0.039634     | 3.27E-04 | 0.68229  | 1.604685 | RNA binding motif protein 47                                                               | Yes                              |
| COMTD1      | 0.014337     | 5.60E-05 | 0.67258  | 1.593921 | catechol-O-methyltransferase domain containing 1                                           | No                               |
| FASTKD1     | 0.005161     | 4.32E-06 | 0.670317 | 1.591423 | FAST kinase domains 1                                                                      | Yes                              |
| RNF14       | 0.006426     | 7.53E-06 | 0.669331 | 1.590335 | ring finger protein 14                                                                     | Yes                              |
| NDUFB9      | 0.006974     | 8.95E-06 | 0.647505 | 1.566456 | NADH:ubiquinone oxidoreductase subunit B9                                                  | Yes                              |
| UQCRLB      | 0.03171      | 2.46E-04 | 0.647012 | 1.565922 | ubiquinol-cytochrome c reductase binding protein                                           | Yes                              |
| FAHD1       | 0.007087     | 1.04E-05 | 0.642023 | 1.560516 | fumarylacetoacetate hydrolase domain containing 1                                          | Yes                              |
| MARC2       | 0.010462     | 3.15E-05 | 0.631896 | 1.549601 | mitochondrial amidoxime reducing component 2                                               | No                               |
| CYCS        | 0.006426     | 7.43E-06 | 0.631739 | 1.549431 | cytochrome c, somatic                                                                      | Yes                              |
| ARHGFE6     | 0.010266     | 2.92E-05 | 0.624106 | 1.541255 | Rac/Cdc42 guanine nucleotide exchange factor 6                                             | Yes                              |
| ATP5C1      | 0.022367     | 1.25E-04 | 0.615961 | 1.532579 | ATP synthase, H <sup>+</sup> transporting, mitochondrial F1 complex, gamma polypeptide 1   | Yes                              |
| GPR3        | 0.014373     | 6.12E-05 | 0.612868 | 1.529296 | G protein-coupled receptor 3                                                               | No                               |
| UQCRC2      | 0.014373     | 6.24E-05 | 0.609512 | 1.525743 | ubiquinol-cytochrome c reductase core protein II                                           | Yes                              |
| MTFR1L      | 0.010293     | 3.02E-05 | 0.604477 | 1.520428 | mitochondrial fission regulator 1 like                                                     | Yes                              |
| MPC2        | 0.007087     | 1.11E-05 | 0.593638 | 1.509048 | mitochondrial pyruvate carrier 2                                                           | Yes                              |
| FH          | 0.031288     | 2.27E-04 | 0.592707 | 1.508074 | fumarate hydratase                                                                         | Yes                              |
| PGAM4       | 0.010264     | 2.83E-05 | 0.590339 | 1.5056   | phosphoglycerate mutase family member 4                                                    | No                               |
| KRTAP20-2   | 0.026391     | 1.68E-04 | 0.589596 | 1.504826 | keratin associated protein 20-2                                                            | No                               |
| PRAD1       | 0.021482     | 1.18E-04 | 0.585724 | 1.500792 | protease associated domain containing 1                                                    | No                               |
| NDUFB10     | 0.006974     | 8.63E-06 | 0.582636 | 1.497583 | NADH:ubiquinone oxidoreductase subunit B10                                                 | Yes                              |
| MGST3       | 0.010264     | 2.86E-05 | 0.5785   | 1.493296 | microsomal glutathione S-transferase 3                                                     | Yes                              |
| IMMT        | 0.026219     | 1.65E-04 | 0.575596 | 1.490293 | inner membrane mitochondrial protein                                                       | Yes                              |
| GAS2L1      | 0.015068     | 6.89E-05 | 0.575317 | 1.490005 | growth arrest specific 2 like 1                                                            | No                               |
| HIGD1A      | 0.023571     | 1.38E-04 | 0.571711 | 1.486285 | HIG1 hypoxia inducible domain family member 1A                                             | Yes                              |
| PPIC        | 0.01599      | 7.49E-05 | 0.571269 | 1.48583  | peptidylprolyl isomerase C                                                                 | Yes                              |
| ACO2        | 0.00862      | 2.02E-05 | 0.570878 | 1.485427 | aconitase 2                                                                                | Yes                              |
| CKB         | 0.014373     | 6.14E-05 | 0.55844  | 1.472676 | creatine kinase B                                                                          | Yes                              |
| DLA         | 0.030104     | 2.10E-04 | 0.550235 | 1.464324 | dihydroliipoamide dehydrogenase                                                            | Yes                              |
| ACACB       | 0.026219     | 1.63E-04 | 0.546196 | 1.460231 | acetyl-CoA carboxylase beta                                                                | No                               |
| ACADM       | 0.035188     | 2.85E-04 | 0.545046 | 1.459067 | acyl-CoA dehydrogenase, C-4 to C-12 straight chain                                         | Yes                              |
| PDHA1       | 0.007087     | 1.04E-05 | 0.544194 | 1.458206 | pyruvate dehydrogenase (lipoamide) alpha 1                                                 | Yes                              |
| NNT         | 0.008963     | 2.15E-05 | 0.543037 | 1.457037 | nicotinamide nucleotide transhydrogenase                                                   | No                               |
| ATP5H       | 0.007874     | 1.58E-05 | 0.540702 | 1.454681 | ATP synthase, H <sup>+</sup> transporting, mitochondrial Fo complex subunit D              | Yes                              |
| ATP5L       | 0.008153     | 1.76E-05 | 0.539188 | 1.453154 | ATP synthase, H <sup>+</sup> transporting, mitochondrial Fo complex subunit G              | Yes                              |
| SMPDL3A     | 0.014487     | 6.38E-05 | 0.538781 | 1.452745 | sphingomyelin phosphodiesterase acid like 3A                                               | No                               |
| TRNP1       | 0.042797     | 3.58E-04 | 0.538611 | 1.452573 | TMF1-regulated nuclear protein 1                                                           | No                               |
| ANG         | 0.019279     | 1.01E-04 | 0.536414 | 1.450363 | angiogenin                                                                                 | No                               |
| CPEB3       | 0.044059     | 3.94E-04 | 0.528399 | 1.442328 | cytoplasmic polyadenylation element binding protein 3                                      | Yes                              |
| LOC10041951 | 0.007851     | 1.40E-05 | 0.527237 | 1.441166 | ring finger protein 4 pseudogene                                                           | No                               |
| ETFDH       | 0.008967     | 2.30E-05 | 0.52447  | 1.438405 | electron transfer flavoprotein dehydrogenase                                               | Yes                              |
| FUT8        | 0.018611     | 9.34E-05 | 0.524157 | 1.438093 | fucosyltransferase 8                                                                       | Yes                              |
| SFXN4       | 0.007851     | 1.53E-05 | 0.519946 | 1.433901 | sideroflexin 4                                                                             | No                               |
| FTH1        | 0.031399     | 2.42E-04 | 0.516888 | 1.430865 | ferritin heavy chain 1                                                                     | Yes                              |
| PPP1R13B    | 0.044367     | 4.38E-04 | 0.510301 | 1.424347 | protein phosphatase 1 regulatory subunit 13B                                               | No                               |
| DLAT        | 0.016639     | 8.17E-05 | 0.508035 | 1.422112 | dihydroliipoamide S-acyltransferase                                                        | Yes                              |
| GSTK1       | 0.011589     | 3.85E-05 | 0.507398 | 1.421484 | glutathione S-transferase kappa 1                                                          | Yes                              |
| OGDH        | 0.016686     | 8.28E-05 | 0.506918 | 1.421011 | oxoglutarate dehydrogenase                                                                 | Yes                              |
| LDHB        | 0.011589     | 3.90E-05 | 0.503295 | 1.417447 | lactate dehydrogenase B                                                                    | Yes                              |
| TMEM136     | 0.031288     | 2.29E-04 | 0.503063 | 1.417219 | transmembrane protein 136                                                                  | No                               |
| CEMIP       | 0.028076     | 1.88E-04 | 0.500373 | 1.414579 | cell migration inducing hyaluronan binding protein                                         | No                               |
| UQCC1       | 0.021482     | 1.19E-04 | 0.491913 | 1.406308 | ubiquinol-cytochrome c reductase complex assembly factor 1                                 | No                               |
| GSTM4       | 0.023571     | 1.40E-04 | 0.491866 | 1.406262 | glutathione S-transferase mu 4                                                             | No                               |
| METRNL      | 0.013606     | 5.01E-05 | 0.490562 | 1.404992 | meteorin like, glial cell differentiation regulator                                        | No                               |
| IL32        | 0.019193     | 9.96E-05 | 0.484049 | 1.398664 | interleukin 32                                                                             | No                               |
| PDHX        | 0.044059     | 4.01E-04 | 0.48243  | 1.397095 | pyruvate dehydrogenase complex component X                                                 | Yes                              |
| ISOC2       | 0.011589     | 3.83E-05 | 0.478969 | 1.393747 | isochorismatase domain containing 2                                                        | Yes                              |
| SUCLA2      | 0.043499     | 3.69E-04 | 0.47687  | 1.391721 | succinate-CoA ligase ADP-forming beta subunit                                              | Yes                              |
| ACSL4       | 0.044286     | 4.19E-04 | 0.473215 | 1.388199 | acyl-CoA synthetase long-chain family member 4                                             | Yes                              |
| COQ9        | 0.015085     | 6.98E-05 | 0.471526 | 1.386576 | coenzyme Q9                                                                                | Yes                              |
| CALM2       | 0.029122     | 1.98E-04 | 0.470024 | 1.385133 | calmodulin 2                                                                               | No                               |
| FAM162A     | 0.029122     | 2.00E-04 | 0.469889 | 1.385003 | family with sequence similarity 162 member A                                               | Yes                              |
| PRCP        | 0.0208       | 1.11E-04 | 0.46722  | 1.382443 | prolylcarboxypeptidase                                                                     | Yes                              |
| CTSL        | 0.039073     | 3.20E-04 | 0.465766 | 1.38105  | cathepsin L                                                                                | Yes                              |
| ATP5F1      | 0.02379      | 1.43E-04 | 0.465763 | 1.381047 | ATP synthase, H <sup>+</sup> transporting, mitochondrial Fo complex subunit B1             | Yes                              |
| ATP5G1      | 0.024936     | 1.53E-04 | 0.465308 | 1.380612 | ATP synthase, H <sup>+</sup> transporting, mitochondrial Fo complex subunit C1 (subunit 9) | No                               |
| COX14       | 0.031288     | 2.31E-04 | 0.462985 | 1.378391 | COX14, cytochrome c oxidase assembly factor                                                | Yes                              |
| PRKRA       | 0.026219     | 1.65E-04 | 0.461306 | 1.376787 | protein activator of interferon induced protein kinase EIF2AK2                             | Yes                              |
| ISCU        | 0.016        | 7.59E-05 | 0.46078  | 1.376285 | iron-sulfur cluster assembly enzyme                                                        | Yes                              |
| COX20       | 0.031288     | 2.33E-04 | 0.457319 | 1.372988 | COX20, cytochrome c oxidase assembly factor                                                | Yes                              |
| APOO        | 0.044286     | 4.21E-04 | 0.448543 | 1.364661 | apolipoprotein O                                                                           | Yes                              |
| MRPL41      | 0.014373     | 6.22E-05 | 0.445028 | 1.361341 | mitochondrial ribosomal protein L41                                                        | No                               |
| ESRRA       | 0.020372     | 1.08E-04 | 0.442483 | 1.358941 | estrogen related receptor alpha                                                            | No                               |

|          |          |          |          |          |                                                                                                         |     |
|----------|----------|----------|----------|----------|---------------------------------------------------------------------------------------------------------|-----|
| LYRM5    | 0.043538 | 3.74E-04 | 0.442127 | 1.358606 | LYR motif containing 5                                                                                  | No  |
| MDH1     | 0.023571 | 1.41E-04 | 0.44052  | 1.357093 | malate dehydrogenase 1                                                                                  | Yes |
| SLC39A8  | 0.02684  | 1.77E-04 | 0.439783 | 1.3564   | solute carrier family 39 member 8                                                                       | Yes |
| SDHA     | 0.023571 | 1.40E-04 | 0.436297 | 1.353127 | succinate dehydrogenase complex flavoprotein subunit A                                                  | Yes |
| UBE3B    | 0.0242   | 1.47E-04 | 0.431886 | 1.348996 | ubiquitin protein ligase E3B                                                                            | No  |
| TRIM47   | 0.031288 | 2.37E-04 | 0.423896 | 1.341545 | tripartite motif containing 47                                                                          | No  |
| CNBP     | 0.035757 | 2.91E-04 | 0.42189  | 1.339682 | CCHC-type zinc finger nucleic acid binding protein                                                      | Yes |
| HADHB    | 0.045095 | 4.48E-04 | 0.418904 | 1.336911 | hydroxyacyl-CoA dehydrogenase/3-ketoacyl-CoA thiolase/enoyl-CoA hydratase (trifunctional protein), beta | Yes |
| SOD2     | 0.04661  | 4.68E-04 | 0.412784 | 1.331253 | superoxide dismutase 2, mitochondrial                                                                   | Yes |
| NACA     | 0.029122 | 2.01E-04 | 0.408295 | 1.327117 | nascent polypeptide-associated complex alpha subunit                                                    | Yes |
| WWP1     | 0.047892 | 4.89E-04 | 0.404271 | 1.32342  | WW domain containing E3 ubiquitin protein ligase 1                                                      | No  |
| UQCRC1   | 0.047892 | 4.88E-04 | 0.402235 | 1.321554 | ubiquinol-cytochrome c reductase core protein I                                                         | Yes |
| CS       | 0.044052 | 3.88E-04 | 0.400584 | 1.320042 | citrate synthase                                                                                        | Yes |
| ANTXR1   | 0.035188 | 2.84E-04 | 0.399578 | 1.319122 | anthrax toxin receptor 1                                                                                | No  |
| COQ3     | 0.033704 | 2.69E-04 | 0.399078 | 1.318665 | coenzyme Q3, methyltransferase                                                                          | Yes |
| SLC25A5  | 0.044059 | 4.00E-04 | 0.395352 | 1.315264 | solute carrier family 25 member 5                                                                       | Yes |
| NDRG3    | 0.04014  | 3.34E-04 | 0.395323 | 1.315237 | NDRG family member 3                                                                                    | Yes |
| HSD17B12 | 0.032132 | 2.54E-04 | 0.394497 | 1.314484 | hydroxysteroid 17-beta dehydrogenase 12                                                                 | Yes |
| SMARCA5  | 0.047913 | 4.92E-04 | 0.390085 | 1.310471 | SWI/SNF related, matrix associated, actin dependent regulator of chromatin, subfamily a, member 5       | Yes |
| RPL9     | 0.044286 | 4.29E-04 | 0.386409 | 1.307136 | ribosomal protein L9                                                                                    | Yes |
| AMY1A    | 0.044321 | 4.35E-04 | 0.377776 | 1.299337 | amylase, alpha 1A (salivary)                                                                            | No  |
| LAMB2    | 0.044286 | 4.24E-04 | 0.3763   | 1.298009 | laminin subunit beta 2                                                                                  | Yes |
| DNAJC4   | 0.044286 | 4.31E-04 | 0.370727 | 1.293004 | DnaJ heat shock protein family (Hsp40) member C4                                                        | No  |
| GON7     | 0.044286 | 4.18E-04 | 0.370591 | 1.292882 | GON7, KEOPS complex subunit homolog                                                                     | No  |
| CHCHD10  | 0.047455 | 4.79E-04 | 0.360415 | 1.283795 | coiled-coil-helix-coiled-coil domain containing 10                                                      | No  |
| NDUFB1   | 0.043538 | 3.78E-04 | 0.360207 | 1.28361  | NADH:ubiquinone oxidoreductase core subunit V1                                                          | Yes |
| AP5M1    | 0.049254 | 5.14E-04 | 0.351922 | 1.276259 | adaptor related protein complex 5 mu 1 subunit                                                          | No  |
| ACAT1    | 0.04661  | 4.66E-04 | 0.351494 | 1.275881 | acetyl-CoA acetyltransferase 1                                                                          | Yes |
| CIPC     | 0.049868 | 5.29E-04 | 0.342753 | 1.268174 | CLOCK interacting pacemaker                                                                             | No  |
| COX5B    | 0.048584 | 5.04E-04 | 0.342519 | 1.267968 | cytochrome c oxidase subunit 5B                                                                         | Yes |

Table S5. Correlation of cell cycle genes with *PPARGC1A* expression in human PCa. Related to Figure 5 and Figure S5.

| Gene B   | Gene A   | TCGA Correlation | TCGA Correlation p value | TCGA Adjusted p value |                                   |      |
|----------|----------|------------------|--------------------------|-----------------------|-----------------------------------|------|
| CCNB1    | PPARGC1A | -0.465150553     | 6.08E-28                 | 7.90E-27              | Adjusted p-value <1e-06; R < -0.3 | #, * |
| NUF2     | PPARGC1A | -0.463749346     | 9.17453E-28              | 1.37618E-26           |                                   | #, * |
| GTSE1    | PPARGC1A | -0.45853943      | 4.1758E-27               | 4.1758E-26            |                                   | #, * |
| MELK     | PPARGC1A | -0.44013991      | 7.18591E-25              | 3.59295E-24           |                                   | #    |
| TACC3    | PPARGC1A | -0.42941351      | 1.25397E-23              | 9.40476E-23           |                                   | #, * |
| EME1     | PPARGC1A | -0.416131135     | 3.76447E-22              | 2.44691E-21           |                                   | #, * |
| KIF2C    | PPARGC1A | -0.413006471     | 8.20008E-22              | 2.73336E-21           |                                   | #, * |
| ERCC6L   | PPARGC1A | -0.409146127     | 2.12159E-21              | 9.19355E-21           |                                   | #    |
| NUSAP1   | PPARGC1A | -0.398165414     | 2.96479E-20              | 1.48239E-19           |                                   | #, * |
| CDC6     | PPARGC1A | -0.395338483     | 5.75462E-20              | 1.87025E-19           |                                   | #    |
| RAD54L   | PPARGC1A | -0.383605174     | 8.4374E-19               | 3.16403E-18           |                                   | #, * |
| KIF14    | PPARGC1A | -0.374831983     | 7.37741E-18              | 1.84435E-17           |                                   | #, * |
| SKA1     | PPARGC1A | -0.368702779     | 2.19314E-17              | 6.57943E-17           |                                   | #, * |
| SHCBP1   | PPARGC1A | -0.357644829     | 2.21024E-16              | 5.52559E-16           |                                   | #, * |
| CENPM    | PPARGC1A | -0.348356345     | 1.43714E-15              | 3.73655E-15           |                                   | #    |
| CCNE2    | PPARGC1A | -0.345353587     | 2.59798E-15              | 5.62895E-15           |                                   | #    |
| CDT1     | PPARGC1A | -0.341545855     | 5.45438E-15              | 1.01296E-14           |                                   | #, * |
| NCAPG2   | PPARGC1A | -0.335054469     | 1.88697E-14              | 4.04351E-14           |                                   | #    |
| ZWILCH   | PPARGC1A | -0.334284794     | 2.18192E-14              | 4.0911E-14            |                                   | #    |
| KIF11    | PPARGC1A | -0.33311297      | 2.71974E-14              | 5.43948E-14           |                                   | #, * |
| KIF15    | PPARGC1A | -0.316886213     | 5.22444E-13              | 8.70741E-13           |                                   | #    |
| RAD51AP1 | PPARGC1A | -0.298071968     | 1.29321E-11              | 1.93982E-11           | Adjusted p-value <1e-06; R < -0.2 | #    |
| KIF23    | PPARGC1A | -0.289216887     | 5.41367E-11              | 7.73381E-11           |                                   | #    |
| ORC1     | PPARGC1A | -0.279747098     | 2.37087E-10              | 3.23301E-10           |                                   | #, * |
| CENPI    | PPARGC1A | -0.265765007     | 4.18147E-09              | 6.79489E-09           |                                   | #    |
| DDIAS    | PPARGC1A | -0.258603309     | 5.26344E-09              | 7.60274E-09           |                                   | #    |
| ESCO2    | PPARGC1A | -0.25607847      | 7.75227E-09              | 1.00779E-08           |                                   | #    |
| E2F8     | PPARGC1A | -0.173349083     | 0.000111278              | 0.000131511           | Adjusted p-value <0.05; R < -0.1  | #    |
| PRR11    | PPARGC1A | -0.169666583     | 0.00024489               | 0.000306113           |                                   | #    |
| MASTL    | PPARGC1A | -0.165224052     | 0.000222397              | 0.000247108           |                                   | #    |
| WDHD1    | PPARGC1A | -0.153015236     | 0.000635708              | 0.000733509           |                                   | #    |
| POLE     | PPARGC1A | -0.098358298     | 0.028661627              | 0.030708886           | NS                                |      |
| INCENP   | PPARGC1A | -0.065775304     | 0.143935559              | 0.143935559           |                                   | #    |
| CEP170   | PPARGC1A | -0.006687397     | 0.882018663              | 0.882018663           |                                   |      |
| BARD1    | PPARGC1A | 0.063333987      | 0.162874499              | 0.176447374           |                                   |      |
| ST18     | PPARGC1A | 0.094628586      | 0.035875551              | 0.035875551           |                                   |      |
| KIF26B   | PPARGC1A | 0.265263579      | 2.04062E-09              | 2.55077E-09           |                                   |      |
| PLK2     | PPARGC1A | 0.310016497      | 1.73173E-12              | 2.88621E-12           |                                   |      |

#Genes significantly (p<0.05) correlated with DFS listed in Table S4

\*Top 14 genes significantly correlated with DFS listed in Table S4



Table S7. PCR primers used in this work. Related to Figures 5, 6 and S6.

| <b>Gene</b> | <b>Forward Primer (5' to 3')</b> | <b>Reverse Primer (5' to 3')</b> | <b>SOURCE</b> | <b>IDENTIFIER</b> |
|-------------|----------------------------------|----------------------------------|---------------|-------------------|
| CCNB1       | AGAGCATCTAAGATTGGAGAG            | CCATGTCATAGTCCAACATAG            | Sigma-Aldrich | N/A               |
| CDT1        | CCTGGGGAAATGGAGAAG               | TTGTCCAGCTTGACGTAG               | Sigma-Aldrich | N/A               |
| GTSE        | CCTCAGGCACTTAACTTTTC             | ATGAGAGGAAGGTCAATGAG             | Sigma-Aldrich | N/A               |
| KIF2C       | CAGTAGTTTTCCAAACTGGG             | TAGGATCAGTCATAGTAAGTGG           | Sigma-Aldrich | N/A               |
| KIF11       | GGAAACTCTGAGTACATTGG             | GAGTTTCTGATTCACTTCAGG            | Sigma-Aldrich | N/A               |
| KIF14       | AAGACAGAATTTGTGGAAGG             | TAGTCGATCTCCATTAGTGTG            | Sigma-Aldrich | N/A               |
| NUF2        | CAATATAAATCCTCTGCGGAC            | GAATCAAGTCTCTCCAGTTT             | Sigma-Aldrich | N/A               |
| NUSAP1      | AGACTCCAGTCTCCAATAAG             | TTTAGCTTTCCTTTGTGTGG             | Sigma-Aldrich | N/A               |
| ORC1        | AACTTAGGTAACCCTCAGATG            | CTGAGATCTCTTAGAAGGTGAG           | Sigma-Aldrich | N/A               |
| RAD54L      | AAAAAGATGCCTTGGTTCTG             | CTGAGAATAGGGTCAACAAC             | Sigma-Aldrich | N/A               |
| SHCBP1      | GAGGTATGTGTTTGGTTATCAG           | GCAGACAATGGATCACTATG             | Sigma-Aldrich | N/A               |
| SKA1        | GATCTGGAACAATTATGCTCTC           | CTGGCCACAGTTTCTTAATG             | Sigma-Aldrich | N/A               |
| TACC3       | AAGACTAAAGAGAACGAGGAG            | GAACATGACACCTAAGAGAATC           | Sigma-Aldrich | N/A               |
| UBC         | CGTCACTTGACAATGCAG               | TGTTTTCCAGCAAAGATCAG             | Sigma-Aldrich | N/A               |
